# Supplementary material
Source: MDPI journal article supplement (https://www.mdpi.com/2313-5778/7/3/48)
Supplement: s1 [file s1]

## Supplementary Table

Table S1: Multivariate analysis of factors associated with married men desire for more children  
(0=equal desire and 1= husband desire more)

|                                   | All men<br>20-59 years |           | Age         |           |             |           |             |            |
|-----------------------------------|------------------------|-----------|-------------|-----------|-------------|-----------|-------------|------------|
| Characteristics                   |                        |           | 20-35 years |           | 36-50 years |           | 51-59 years |            |
| <i>Individual characteristics</i> | aOR                    | 95%CI     | aOR         | 95%CI     | aOR         | 95%CI     | aOR         | 95%CI      |
| <b>Age</b>                        |                        |           |             |           |             |           |             |            |
| 20-35 (ref)                       |                        |           |             |           |             |           |             |            |
| 36-50                             | 0.82                   | 0.56-1.19 |             |           |             |           |             |            |
| 51-59                             | 0.93                   | 0.54-1.61 |             |           |             |           |             |            |
| <b>Place of Residence</b>         |                        |           |             |           |             |           |             |            |
| Urban (ref)                       |                        |           |             |           |             |           |             |            |
| Rural                             | 1.33                   | 0.92-1.91 | 1.14        | 0.68-1.91 | 1.14        | 0.73-1.76 | 1.41        | 0.49-4.00  |
| <b>Religion</b>                   |                        |           |             |           |             |           |             |            |
| Christian (ref)                   |                        |           |             |           |             |           |             |            |
| Islam                             | 1.65**                 | 1.15-2.37 | 1.50        | 0.94-2.38 | 1.66*       | 1.09-2.51 | 1.14        | 0.43-3.04  |
| Other                             | 1.65*                  | 1.12-2.43 | 1.40        | 0.80-2.45 | 1.49        | 0.90-2.47 | 3.33*       | 1.13-9.80  |
| <b>Wealth Quintile</b>            |                        |           |             |           |             |           |             |            |
| Poorest (ref)                     |                        |           |             |           |             |           |             |            |
| Poorer                            | 0.66*                  | 0.44-0.98 | 0.46**      | 0.26-0.80 | 0.63        | 0.38-1.04 | 1.15        | 0.40-3.24  |
| Middle                            | 0.69                   | 0.47-1.01 | 0.66        | 0.38-1.15 | 0.62        | 0.36-1.04 | 0.76        | 0.22-2.62  |
| Richer                            | 0.78                   | 0.49-1.23 | 0.68        | 0.36-1.32 | 0.66        | 0.37-1.18 | 0.43        | 0.10-1.95  |
| Richest                           | 0.65                   | 0.39-1.10 | 0.67        | 0.31-1.48 | 0.67        | 0.35-1.28 | 1.29        | 0.28-5.93  |
| <b>Current contraceptive use</b>  |                        |           |             |           |             |           |             |            |
| No method (ref)                   |                        |           |             |           |             |           |             |            |
| Any method                        | 1.13                   | 0.84-1.51 | 0.96        | 0.63-1.46 | 0.87        | 0.60-1.27 | 1.42        | 0.59-3.43  |
| <b>Age at first marriage</b>      |                        |           |             |           |             |           |             |            |
| < 20 years (ref)                  |                        |           |             |           |             |           |             |            |
| 20 years +                        | 0.66                   | 0.43-1.01 | 0.74        | 0.45-1.20 | 0.87        | 0.52-1.46 | 0.92        | 0.19-4.31  |
| <b>Parity</b>                     |                        |           |             |           |             |           |             |            |
| 0-1 (ref)                         |                        |           |             |           |             |           |             |            |
| 2-3                               | 1.23                   | 0.81-1.87 | 1.67*       | 1.11-2.52 | 1.11        | 0.60-2.02 | 1.72        | 0.13-22.13 |
| 4+                                | 2.22**                 | 1.40-3.52 | 3.14***     | 1.77-5.58 | 1.89*       | 1.04-3.43 | 4.97        | 0.43-58.09 |
| <i>Couple Characteristics</i>     |                        |           |             |           |             |           |             |            |
| <b>Difference in Education</b>    |                        |           |             |           |             |           |             |            |
| Same education (ref)              |                        |           |             |           |             |           |             |            |
| Husband more educated             | 0.79                   | 0.57-1.10 | 0.85        | 0.56-1.30 | 0.74        | 0.51-1.07 | 0.95        | 0.40-2.26  |
| Wife more educated                | 1.07                   | 0.72-1.59 | 1.28        | 0.78-2.10 | 0.93        | 0.58-1.50 | 1.56        | 0.48-5.04  |
| <b>Age Difference</b>             |                        |           |             |           |             |           |             |            |

|                         |         |           |        |           |       |           |  |  |
|-------------------------|---------|-----------|--------|-----------|-------|-----------|--|--|
| Same Age (ref)          |         |           |        |           |       |           |  |  |
| Husband older 1-5 years | 2.52**  | 1.43-4.45 | 1.88*  | 1.01-3.50 | 1.58  | 0.78-3.24 |  |  |
| Husband older 6+ years  | 3.22*** | 1.84-5.65 | 2.45** | 1.25-4.77 | 2.30* | 1.14-4.62 |  |  |

\*Data analysis excludes women who want more children than their partners
